# Supplementary material
Source: HighWire-hosted journal article supplement (https://rmdopen.bmj.com/content/8/2/e002026)
Supplement: inline-supplementary-material-1 [file inline-supplementary-material-1.pdf]

## SUPPLEMENTARY TABLES

| Supplementary table 1. Search Strategy |                                                                         |                                                                           |
|----------------------------------------|-------------------------------------------------------------------------|---------------------------------------------------------------------------|
| MEDLINE                                | EMBASE                                                                  | Cochrane                                                                  |
| 1. exp Coronavirus/                    | 1. exp Coronavirinae/                                                   | 1. MeSH descriptor: [Coronavirus] explode all trees                       |
| 2. exp Coronavirus Infections/         | 2. exp Coronavirus infection/                                           | 2. MeSH descriptor: [Coronavirus Infections] explode all trees            |
| 3. 2019-nCoV*                          | 3. coronavirus disease 2019.sh,dj.                                      | 3. (((corona* or corono*) near/1 (virus* or viral* or virinae*)):ti,ab,kw |
| 4. 2019nCoV*                           | 4. severe acute respiratory syndrome coronavirus 2.sh,dj.               | 4. ((coronavirus* or coronovirus* or coronavirinae* or CoV)):ti,ab,kw     |
| 5. 19-nCoV*                            | 5. ((corona* or corono*) adj1 (virus* or viral* or virinae*)):ti,ab,kw. | 5. 2019 nCoV:ti,ab,kw                                                     |
| 6. nCoV2019*                           | 6. 2019-nCoV*                                                           | 6. 19 nCoV:ti,ab,kw                                                       |
| 7. nCoV19*                             | 7. 2019nCoV*                                                            | 7. nCoV2019*:ti,ab,kw                                                     |
| 8. nCoV-19*                            | 8. 19-nCoV*                                                             | 8. nCoV 2019:ti,ab,kw                                                     |
| 9. COVID-19*                           | 9. nCoV2019*                                                            | 9. nCoV19*:ti,ab,kw                                                       |
| 10. COVID19*                           | 10. nCoV-2019*                                                          | 10. nCoV 19:ti,ab,kw                                                      |
| 11. COVID-2019*                        | 11. nCoV19*                                                             | 11. COVID 19:ti,ab,kw                                                     |
| 12. COVID2019*                         | 12. nCoV-19*                                                            | 12. COVID19*:ti,ab,kw                                                     |
| 13. HCoV-19*                           | 13. COVID-19*                                                           | 13. COVID 2019:ti,ab,kw                                                   |
| 14. 2019 novel*                        | 14. COVID19*                                                            | 14. HCoV 19:ti,ab,kw                                                      |
| 15. Ncov*                              | 15. COVID-2019*                                                         | 15. HCoV 2019:ti,ab,kw                                                    |
| 16. n-cov                              | 16. COVID2019*                                                          | 16. 2019 novel:ti,ab,kw                                                   |
| 17. SARS-CoV-2*                        | 17. HCoV-19*                                                            | 17. Ncov*:ti,ab,kw                                                        |
| 18. SARSCoV-2                          | 18. 2019 novel*                                                         | 18. n cov:ti,ab,kw                                                        |
| 19 SARSCoV2*                           | 19. Ncov*                                                               | 19. SARS CoV 2:ti,ab,kw                                                   |
| 20. SARS-CoV2*                         | 20. n-cov                                                               | 20. SARSCoV 2:ti,ab,kw                                                    |
| 21. SARS-Cov19*                        | 21. SARS-CoV-2*                                                         | 21. SARSCoV2:ti,ab,kw                                                     |
| 22. SARSCov-19*                        | 22. SARSCoV-2*                                                          | 22. SARS CoV2:ti,ab,kw                                                    |
| 23. SARS-Cov-19*                       | 23. SARSCoV2*                                                           | 23. SARS Cov19:ti,ab,kw                                                   |
| 24. SARS-Cov-2019*                     | 24. SARS-CoV2*                                                          | 24. SARSCov 19:ti,ab,kw                                                   |
| 25. SARS2*                             | 25. SARS-Cov19*                                                         | 25. SARS Cov 19:ti,ab,kw                                                  |
| 26. SARS-2*                            | 26. SARSCov-19*                                                         | 26. SARSCov 2019:ti,ab,kw                                                 |
| 27. SARS-coronavirus-2*                |                                                                         |                                                                           |
| 28. SARScoronavirus 2*                 |                                                                         |                                                                           |
| 29. SARS coronavirus2*                 |                                                                         |                                                                           |
| 30. (covid).ti,ab,kw,kf                |                                                                         |                                                                           |

|                                                                                                                                                                                                                                                                                                                                                                                                                                                                                                                |                                                                                                                                                                                                                                                                                                                                                                                                                                                                                                                                                                              |                                                                                                                                                                                                                                                                                                                                                                                                                                                                                                                                                                                                                       |
|----------------------------------------------------------------------------------------------------------------------------------------------------------------------------------------------------------------------------------------------------------------------------------------------------------------------------------------------------------------------------------------------------------------------------------------------------------------------------------------------------------------|------------------------------------------------------------------------------------------------------------------------------------------------------------------------------------------------------------------------------------------------------------------------------------------------------------------------------------------------------------------------------------------------------------------------------------------------------------------------------------------------------------------------------------------------------------------------------|-----------------------------------------------------------------------------------------------------------------------------------------------------------------------------------------------------------------------------------------------------------------------------------------------------------------------------------------------------------------------------------------------------------------------------------------------------------------------------------------------------------------------------------------------------------------------------------------------------------------------|
| <p>31. (severe acute respiratory syndrome*).ti,ab,kw,kf<br/> 32. ((corona* or corono*) adj1 (virus* or viral* or virinae*)).ti,ab,kw,kf.<br/> 33. (coronavirus* or coronovirus* or coronavirinae* or CoV).ti,ab,kw,kf<br/> 34. or/1-33<br/> 35. reactive arthritis.mp. or reactive arthritis/<br/> 36. reiter* syndrome.mp.<br/> 37. Reiter* disease.mp.<br/> 38. infectious arthritis.mp.<br/> 39. post-infectious arthritis.mp.<br/> 40. exp arthrtisi, infectious/<br/> 41. or/35-40<br/> 42. 34 AND 41</p> | <p>27. SARS-Cov-19*<br/> 28. SARS-Cov-2019*<br/> 29. SARS2*<br/> 30. SARS-2*<br/> 31. SARS-coronavirus-2*<br/> 32. SARSCoronavirus 2*<br/> 33. SARS coronavirus2*<br/> 34. (covid).ti,ab,kw.<br/> 35. (severe acute respiratory syndrome*).ti,ab,kw.<br/> 36. (coronavirus* or coronovirus* or coronavirinae* or CoV).ti,ab,kw.<br/> 37. or/1-36<br/> 38. exp arthritis, reactive/<br/> 39. reactive arthritis<br/> 40. reiter* syndrome<br/> 41. reiter* disease<br/> 42. exp arthritis, infectious/<br/> 43. infectious arthritis<br/> 44. or/38-43<br/> 45. 37 AND 44</p> | <p>27. SARS Cov 2019:ti,ab,kw<br/> 28. SARS2*:ti,ab,kw<br/> 29. SARS 2:ti,ab,kw<br/> 30. SARS coronavirus 2:ti,ab,kw<br/> 31. SARSCoronavirus 2:ti,ab,kw<br/> 32. SARS coronavirus2:ti,ab,kw<br/> 33. SARS coronavirus 2:ti,ab,kw<br/> 34. covid:ti,ab,kw<br/> 35. severe acute respiratory syndrome<br/> 36. severe acute respiratory syndromes<br/> 37. or/1-36<br/> 38. MeSH descriptor: [Arthritis, Reactive] explode all trees<br/> 39. reactive arthritis<br/> 40. reiter* syndrome<br/> 41. reiter* disease<br/> 42. arthritis* infect*<br/> 43. infectious arthritis<br/> 44. or/38-43<br/> 45. 37 AND 44</p> |
|----------------------------------------------------------------------------------------------------------------------------------------------------------------------------------------------------------------------------------------------------------------------------------------------------------------------------------------------------------------------------------------------------------------------------------------------------------------------------------------------------------------|------------------------------------------------------------------------------------------------------------------------------------------------------------------------------------------------------------------------------------------------------------------------------------------------------------------------------------------------------------------------------------------------------------------------------------------------------------------------------------------------------------------------------------------------------------------------------|-----------------------------------------------------------------------------------------------------------------------------------------------------------------------------------------------------------------------------------------------------------------------------------------------------------------------------------------------------------------------------------------------------------------------------------------------------------------------------------------------------------------------------------------------------------------------------------------------------------------------|

| <b>Supplementary Table 2. Articles excluded and reason(s) for exclusion</b> |                                   |
|-----------------------------------------------------------------------------|-----------------------------------|
| <b>Reference</b>                                                            | <b>Exclusion criteria</b>         |
| Jovani et al (1)                                                            | Commentary to a published article |
| Wendling et al (2)                                                          | Review                            |
| Jaladhar et al (3)                                                          | Other rheumatic diseases          |
| Fayed et al (4)                                                             | Abstract                          |
| Waller et al (5)                                                            | Abstract                          |
| Zeidler et al (6)                                                           | Review                            |
| Kobayashi et al (7)                                                         | Commentary to a published article |
| Watad et al (8)                                                             | Other rheumatic diseases          |
| Massel et al (9)                                                            | Other rheumatic diseases          |
| Li et al (10)                                                               | Other rheumatic diseases          |
| El Hasbani et al (11)                                                       | Other rheumatic diseases          |
| An QJ et al (12)                                                            | Arthritis post-COVID vaccination  |
| Baimukhamedov et al (13)                                                    | Arthritis post-COVID vaccination  |
| Turk et al (14)                                                             | Arthritis post-COVID vaccination  |
| Unal Enginar A (15)                                                         | Arthritis post-COVID vaccination  |

## References

1. Jovani V, Pascual E, Vela P, Andres M. Acute arthritis following SARS-CoV-2 infection. *Journal of Medical Virology*. 2021;93(2):661.
2. Wendling D, Verhoeven F, Chouk M, Prati C. Can SARS-CoV-2 trigger reactive arthritis? *Joint Bone Spine*. 2021;88(1) (no pagination).
3. Jaladhar P, S C, Salanke M, Kori D. The Pattern of Post-viral Arthritis in COVID Pandemic State: An Experience of Tertiary Care Centre. *The Journal of the Association of Physicians of India*. 2021;69(8):11-2.
4. Fayed F, Abdelkarim E. Post COVID arthritis; reactive arthritis or rheumatic disease flare or both. *Annals of the Rheumatic Diseases*. 2021;80(SUPPL 1):871.
5. Waller R, Price E, Carty S, Ahmed A, Collins D. Post COVID-19 reactive arthritis. *Rheumatology Advances in Practice*. 2020;4(SUPPL 1):i17.
6. Zeidler H. Post-Corona-Virus-Disease-19 arthritis. Manifestation under the clinical picture of a reactive arthritis. [German]. *Zeitschrift fur Rheumatologie*. 2021;80(6):555-8.
7. Kobayashi S, Taniguchi Y, Kida I, Tamura N. SARS-CoV2-triggered acute arthritis: Viral arthritis rather than reactive arthritis. *Journal of Medical Virology*. 2021;93(12):6458-9.
8. Watad A, De Marco G, Mahajna H, Druyan A, Eltity M, Hijazi N, et al. Immune-mediated disease flares or new-onset disease in 27 subjects following mrna/dna sars-cov-2 vaccination. *Vaccines*. 2021;9(5) (no pagination).
9. Massel DH, Haziza S, Rivera S, Mohile N, Subhawong TK, Hernandez VH. Septic Arthritis of the Shoulder After SARS-CoV-2 Pfizer Vaccination: A Case Report. *JBJS case connector*. 2021;11(3).
10. Li X, Tong X, Yeung WWY, Kuan P, Yum SHH, Chui CSL, et al. Two-dose COVID-19 vaccination and possible arthritis flare among patients with rheumatoid arthritis in Hong Kong. *Annals of the rheumatic diseases*. 2021;22.
11. El Hasbani G, Jawad A, Uthman I. Axial and peripheral spondyloarthritis triggered by sars-cov-2 infection: a report of two cases. *Reumatismo*. 2021;73(1):59-63.
12. An QJ, Qin DA, Pei JX. Reactive arthritis after COVID-19 vaccination. *Human Vaccines and Immunotherapeutics*. 2021;17(9):2954-6.
13. Baimukhamedov C. Arthritis of the left elbow joint after vaccination against SARS-CoV-2 infection. *Int J Rheum Dis*. 2021;24(9):1218-20.
14. Turk SM, Ozturk Z, Karatas D, Gonullu E. Inactivated Covid-19 Vaccine Can Induce Reactive Polyarthritis in Older Patients: Report of Two Cases. *Georgian Medical News*. 2021(319):100-2.
15. Unal Enginar A. Arthritis following COVID-19 vaccination: report of two cases. *International Immunopharmacology*. 2021;Part B. 101 (no pagination).
